# Supplementary material for: Down-titration of biologics for the treatment of rheumatoid arthritis: a systematic literature review
Source: Springer Nature journal article supplement (doi:10.1007/s00296-017-3780-8), 2017-08-29
Supplement: MOESM1 [file 14936944]

## Online Resources

### **Down-titration of biologics for the treatment of rheumatoid arthritis: A systematic literature review**

*Rheumatology International*

Chak Sing Lau; Allan Gibofsky; Nemanja Damjanov; Sadiq Lula; Lisa Marshall; Heather Jones; Paul Emery

Corresponding Author:

Chak Sing Lau

Division of Rheumatology and Clinical Immunology

The University of Hong Kong

Hong Kong

Email: [CSLau@hku.hk](mailto:CSLau@hku.hk)

## Online Resource 1.

Electronic database search strategy: Ovid MEDLINE In-Process and other non-indexed citations and Ovid MEDLINE 1946 to present

| Search number | Search terms                                                                                                                                                                                     | Parameter    | Hits     |
|---------------|--------------------------------------------------------------------------------------------------------------------------------------------------------------------------------------------------|--------------|----------|
| 1             | exp rheumatoid arthritis/ or exp Spondylitis, Ankylosing/                                                                                                                                        | Disease      | 105,527  |
| 2             | rheumatoid arthritis.tw.                                                                                                                                                                         |              | 81,923   |
| 3             | ((rheumatoid or reumatoid or revmatoid or rheumatic or rheumatic or revmatic or rheumat\$ or reumat\$ or revmarthrit\$) adj3 (arthrit\$ or artrit\$ or diseas\$ or condition\$ or nodule\$)).tw. |              | 101,137  |
| 4             | (felty\$ adj2 syndrome).tw.                                                                                                                                                                      |              | 693      |
| 5             | (caplan\$ adj2 syndrome).tw.                                                                                                                                                                     |              | 116      |
| 6             | (sjogren\$ adj2 syndrome).tw.                                                                                                                                                                    |              | 11,842   |
| 7             | (sicca adj2 syndrome).tw.                                                                                                                                                                        |              | 773      |
| 8             | still\$ disease.tw.                                                                                                                                                                              |              | 1,709    |
| 9             | (ankylosing spondylitis or 'AS').tw.                                                                                                                                                             |              | 9,955    |
| 10            | (bekhterev or bechterew or marie strumpell or rheumatoid spondylitis or ankylos* or spondyl* or axial).tw.                                                                                       |              | 93,440   |
| 11            | (Non\$radiographic or radiograph* or nr-axSpA).tw.                                                                                                                                               |              | 163,447  |
| 12            | or/1-11                                                                                                                                                                                          |              | 381,853  |
| 13            | (Abatacept or orenicia or BMS-224818 or BMS 188667).mp.                                                                                                                                          | Intervention | 2,749    |
| 14            | (Adalimumab or Humira or Hum?ra).mp.                                                                                                                                                             |              | 4,501    |
| 15            | (certolizumab or CDP870 or CDP 870 or PHA738144 or PHA 738144 or Cimzia).mp.                                                                                                                     |              | 598      |
| 16            | (certolizumab adj2 pegol).mp.                                                                                                                                                                    |              | 471      |
| 17            | (Etanercept or Enbrel or or ETA or ETN).mp.                                                                                                                                                      |              | 17,263   |
| 18            | (golimumab or CNTO 148 or CNTO148 or Simponi).mp.                                                                                                                                                |              | 406      |
| 19            | (Infliximab or Remicade or Avakine).mp.                                                                                                                                                          |              | 9,843    |
| 20            | (Rituximab or rituxan or Mabthera).mp.                                                                                                                                                           |              | 13,601   |
| 21            | (Tocilizumab or actemra or atlizumab).mp.                                                                                                                                                        |              | 1,115    |
| 22            | or/13-21                                                                                                                                                                                         |              |          |
| 23            | 12 and 22                                                                                                                                                                                        |              | 7,887    |
| 24            | randomized controlled trial.pt.                                                                                                                                                                  |              | 401,556  |
| 25            | controlled clinical trial.pt.                                                                                                                                                                    |              | 90,822   |
| 26            | randomi?ed.ab.                                                                                                                                                                                   |              | 385,775  |
| 27            | placebo.tw.                                                                                                                                                                                      |              | 169,359  |
| 28            | drug therapy.fs.                                                                                                                                                                                 |              | 1789,870 |
| 29            | clinical trials as topic.sh.                                                                                                                                                                     |              | 176,781  |
| 30            | randomly.ab.                                                                                                                                                                                     |              | 230,591  |
| 31            | trial.ab.                                                                                                                                                                                        |              | 336,214  |

|    |                                                                                                                                                                                                                                                                                                                                                                                                                                                                                                                                                                         |              |           |
|----|-------------------------------------------------------------------------------------------------------------------------------------------------------------------------------------------------------------------------------------------------------------------------------------------------------------------------------------------------------------------------------------------------------------------------------------------------------------------------------------------------------------------------------------------------------------------------|--------------|-----------|
| 32 | groups.ab.                                                                                                                                                                                                                                                                                                                                                                                                                                                                                                                                                              | Study design | 1448,661  |
| 33 | (crossover or cross-over or cross over).tw.                                                                                                                                                                                                                                                                                                                                                                                                                                                                                                                             |              | 64,276    |
| 34 | ((singl\$ or double\$ or triple\$ or treble\$) and (blind\$ or mask\$)).tw,sh.                                                                                                                                                                                                                                                                                                                                                                                                                                                                                          |              | 159,960   |
| 35 | (case control or case-control).ti,ab.                                                                                                                                                                                                                                                                                                                                                                                                                                                                                                                                   |              | 85,986    |
| 36 | ((follow up or follow-up) adj (study or studies)).ti,ab.                                                                                                                                                                                                                                                                                                                                                                                                                                                                                                                |              | 39,602    |
| 37 | (Longitudinal or retrospective or prospective or comparative or cohort or cross sectional or cross-sectional).ti,ab.                                                                                                                                                                                                                                                                                                                                                                                                                                                    |              | 1351,520  |
| 38 | ((observ\$ or registry) adj3 (study or studies)).ti,ab.                                                                                                                                                                                                                                                                                                                                                                                                                                                                                                                 |              | 106,302   |
| 39 | or/24-38                                                                                                                                                                                                                                                                                                                                                                                                                                                                                                                                                                |              | 4,672,267 |
| 40 | (exp Costs/ and cost analysis/) or cost-benefit analysis/                                                                                                                                                                                                                                                                                                                                                                                                                                                                                                               |              | 104,776   |
| 41 | Economics, Pharmaceutical/ or Economics, Medical/ or Economics/ or exp Economics, Hospital/ or Economics, Dental/ or Economics, Nursing/                                                                                                                                                                                                                                                                                                                                                                                                                                |              | 64,363    |
| 42 | (economic\$ or cost or costs or costly or costing or price or prices or pricing or pharmacoeconomic\$).ti,ab.                                                                                                                                                                                                                                                                                                                                                                                                                                                           |              | 502,180   |
| 43 | (expenditure\$ not energy).ti,ab.                                                                                                                                                                                                                                                                                                                                                                                                                                                                                                                                       |              | 20,171    |
| 44 | (value adj1 money).ti,ab.                                                                                                                                                                                                                                                                                                                                                                                                                                                                                                                                               |              | 30        |
| 45 | budget\$.ti,ab.                                                                                                                                                                                                                                                                                                                                                                                                                                                                                                                                                         |              | 20,166    |
| 46 | or/40-45                                                                                                                                                                                                                                                                                                                                                                                                                                                                                                                                                                |              | 594,612   |
| 47 | ((energy or oxygen) adj cost).ti,ab.                                                                                                                                                                                                                                                                                                                                                                                                                                                                                                                                    |              | 3,070     |
| 48 | (metabolic adj cost).ti,ab.                                                                                                                                                                                                                                                                                                                                                                                                                                                                                                                                             |              | 914       |
| 49 | ((energy or oxygen) adj expenditure).ti,ab.                                                                                                                                                                                                                                                                                                                                                                                                                                                                                                                             |              | 18,721    |
| 50 | or/47-49                                                                                                                                                                                                                                                                                                                                                                                                                                                                                                                                                                |              | 21,915    |
| 51 | 46 not 50                                                                                                                                                                                                                                                                                                                                                                                                                                                                                                                                                               |              | 589,758   |
| 52 | Quality-Adjusted Life Years/                                                                                                                                                                                                                                                                                                                                                                                                                                                                                                                                            |              | 7,642     |
| 53 | exp "Outcome and Process Assessment (Health Care)"/ or exp "Outcome Assessment (Health Care)"/ or exp Treatment Outcome/ or exp "Quality of Life"/                                                                                                                                                                                                                                                                                                                                                                                                                      |              | 869,944   |
| 54 | ((sf or short form or shortform) and "6").tw.                                                                                                                                                                                                                                                                                                                                                                                                                                                                                                                           |              | 8,476     |
| 55 | (EuroQol or standard gamble or time trade off or time tradeoff or TTO or EQ5D or EQ-5D or health utilit\$ index).tw.                                                                                                                                                                                                                                                                                                                                                                                                                                                    |              | 6,594     |
| 56 | ((Health and utilit* and index) or HUI* or SF-6D or sf6* or sf 6* or short form 6* or shortform 6* or sf six or sfsix or short form six or shortform six or QALY or quality adjusted life year* or quality-adjusted life year or quality adjusted life-year* or quality-adjusted life-year* or SF-36 or sf36 or sf 36 or short form 36 or shortform 36 or sf thirtysix or sf thirty six or shortform thirtysix or shortform thirty six or short form thirtysix or short form thirty-six or short form thirty six or short form health survey or willingness to pay).tw. |              | 34,254    |
| 57 | ((utilit* and score*) or (utilit* and weight*) or Rosser or (health and utilit*) or (utilit* and value) or disutility*).tw.                                                                                                                                                                                                                                                                                                                                                                                                                                             |              | 36,250    |
| 58 | (outcome and measure\$).tw.                                                                                                                                                                                                                                                                                                                                                                                                                                                                                                                                             |              | 245,112   |
| 59 | (health and outcome\$).tw.                                                                                                                                                                                                                                                                                                                                                                                                                                                                                                                                              |              | 166,310   |
| 60 | or/52-59                                                                                                                                                                                                                                                                                                                                                                                                                                                                                                                                                                |              | 1,175,590 |

|           |                                        |  |              |
|-----------|----------------------------------------|--|--------------|
| 61        | 39 or 51 or 60                         |  | 5,556,250    |
| 62        | 23 and 61                              |  | 6,810        |
| 63        | (animals not (humans and animals)).sh. |  | 4,004,891    |
| 64        | 61 not 63                              |  | 4,927,391    |
| 65        | 23 and 64                              |  | 6,762        |
| 66        | limit 65 to English language           |  | 6,051        |
| <b>67</b> | <b>limit 66 to yr="2000 -Current"</b>  |  | <b>5,994</b> |

### Electronic database search strategy: Embase 1988 to present

| Search number | Search terms                                                                                                                                                                                    | Parameter    | Hits    |
|---------------|-------------------------------------------------------------------------------------------------------------------------------------------------------------------------------------------------|--------------|---------|
| 1             | exp rheumatoid arthritis/ or exp spondylarthritis/ or exp ankylosing spondylitis/ or exp spondyloarthropathy/                                                                                   | Disease      | 128,537 |
| 2             | ((rheumatoid or reumatoid or revmatoid or rheumatic or reumatic or revmatic or rheumat\$ or reumat\$ or revmarthrit\$) adj3 (arthrit\$ or artrit\$ or diseas\$ or condition\$ or nodule\$)).tw. |              | 103,828 |
| 3             | (felty\$ adj2 syndrome).tw.                                                                                                                                                                     |              | 386     |
| 4             | (caplan\$ adj2 syndrome).tw.                                                                                                                                                                    |              | 42      |
| 5             | (sjogren\$ adj2 syndrome).tw                                                                                                                                                                    |              | 12,004  |
| 6             | (sicca adj2 syndrome).tw.                                                                                                                                                                       |              | 734     |
| 7             | still\$ disease.tw                                                                                                                                                                              |              | 1,811   |
| 8             | (ankylosing spondylitis or 'AS').tw.                                                                                                                                                            |              | 12,448  |
| 9             | (bekhterev or bechterew or marie strumpell or rheumatoid spondylitis or ankylos* or spondyl* or axial).tw.                                                                                      |              | 91,229  |
| 10            | (Non\$radiographic or radiograph* or nr-axSpA).tw.                                                                                                                                              |              | 156,014 |
| 11            | or/1-10                                                                                                                                                                                         |              | 380,303 |
| 12            | exp abatacept/ or exp adalimumab/ or exp certolizumab pegol/ or exp etanercept/ or exp golimumab/ or exp infliximab/ or exp rituximab/ or exp tocilizumab/ or exp ustekinumab/                  | Intervention | 83,658  |
| 13            | (Abatacept or orenicia or or BMS-224818 or BMS 188667).mp.                                                                                                                                      |              | 5,473   |
| 14            | (Adalimumab or Humira or Hum?ra).mp.                                                                                                                                                            |              | 17,099  |
| 15            | (certolizumab or CDP870 or CDP 870 or PHA738144 or PHA 738144 or Cimzia).mp.                                                                                                                    |              | 3,384   |
| 16            | (certolizumab adj2 pegol).mp.                                                                                                                                                                   |              | 3,049   |
| 17            | (Etanercept or Enbrel or ETA or ETN).mp.                                                                                                                                                        |              | 29,146  |
| 18            | (golimumab or CNTO 148 or CNTO148 or Simponi).mp.                                                                                                                                               |              | 2,495   |
| 19            | (Infliximab or Remicade or Avakine).mp.                                                                                                                                                         |              | 31,318  |
| 20            | (Rituximab or rituxan or Mabthera).mp.                                                                                                                                                          |              | 43,093  |
| 21            | (Tocilizumab or actemra or atlizumab).mp.                                                                                                                                                       |              | 4,406   |
| 22            | or/12-21                                                                                                                                                                                        |              |         |

|    |                                                                                                                      |              |           |
|----|----------------------------------------------------------------------------------------------------------------------|--------------|-----------|
| 23 | 11 and 22                                                                                                            |              | 24,031    |
| 24 | (random\$ or placebo\$).ti,ab                                                                                        |              | 946,307   |
| 25 | clinical trial/                                                                                                      | Study design | 791,848   |
| 26 | random\$.tw.                                                                                                         |              | 879,921   |
| 27 | randomized controlled trial/                                                                                         |              | 340,282   |
| 28 | trial\$.tw.                                                                                                          |              | 789,789   |
| 29 | controlled study/                                                                                                    |              | 4,407,623 |
| 30 | double blind procedure/                                                                                              |              | 109,470   |
| 31 | placebo\$.tw.                                                                                                        |              | 188,209   |
| 32 | (singl\$ adj (blind\$ or mask\$)).tw.                                                                                |              | 14,128    |
| 33 | (crossover\$ or cross-over\$).ti,ab.                                                                                 |              | 63,406    |
| 34 | (double\$ adj (blind\$ or mask\$)).tw.                                                                               |              | 130,046   |
| 35 | Crossover Procedure/                                                                                                 |              | 40,750    |
| 36 | Single Blind Procedure/                                                                                              |              | 19,125    |
| 37 | ((triple\$ or treble\$) adj (blind\$ or mask\$)).tw.                                                                 |              | 420       |
| 38 | (Longitudinal or retrospective or prospective or comparative or cohort or cross sectional or cross-sectional).ti,ab. |              | 1,589,551 |
| 39 | ((observ\$ or registry) adj3 (study or studies)).ti,ab.                                                              |              | 137,053   |
| 40 | (case control or case-control).ti,ab.                                                                                |              | 94,143    |
| 41 | or/24-40                                                                                                             |              | 6,547,318 |
| 42 | health-economics/ or exp economic-evaluation/ or exp health-care-cost/ or exp pharmacoeconomics/                     |              | 447,193   |
| 43 | (econom\$ or cost or costs or costly or costing or price or prices or pricing or pharmacoeconomic\$).ti,ab.          |              | 570,579   |
| 44 | (expenditure\$ not energy).ti,ab.                                                                                    |              | 21,961    |
| 45 | (value adj2 money).ti,ab.                                                                                            |              | 1,398     |
| 46 | budget\$.ti,ab.                                                                                                      |              | 21,828    |
| 47 | or/42-46                                                                                                             |              | 835,491   |
| 48 | (metabolic adj cost).ti,ab.                                                                                          |              | 812       |
| 49 | ((energy or oxygen) adj cost).ti,ab.                                                                                 |              | 2629      |
| 50 | ((energy or oxygen) adj expenditure).ti,ab.                                                                          |              | 19,318    |
| 51 | or/48-50                                                                                                             |              | 22,045    |
| 52 | 47 not 51                                                                                                            |              | 831,062   |
| 53 | exp quality adjusted life year/                                                                                      |              | 13,001    |
| 54 | exp treatment outcome/                                                                                               |              | 1,010,827 |
| 55 | exp "quality of life"/                                                                                               |              | 281,076   |
| 56 | exp outcome assessment/                                                                                              |              | 258,518   |
| 57 | ((sf or short form or shortform) and "6").tw.                                                                        |              | 12,180    |
| 58 | (EuroQol or standard gamble or time trade off or time tradeoff or TTO or                                             |              | 9,946     |

|           |                                                                                                                                                                                                                                                                                                                                                                                                                                                                                                                                                                         |  |               |
|-----------|-------------------------------------------------------------------------------------------------------------------------------------------------------------------------------------------------------------------------------------------------------------------------------------------------------------------------------------------------------------------------------------------------------------------------------------------------------------------------------------------------------------------------------------------------------------------------|--|---------------|
|           | EQ5D or EQ-5D or health utilit\$ index).tw.                                                                                                                                                                                                                                                                                                                                                                                                                                                                                                                             |  |               |
| 59        | ((Health and utilit* and index) or HUI* or SF-6D or sf6* or sf 6* or short form 6* or shortform 6* or sf six or sfsix or short form six or shortform six or QALY or quality adjusted life year* or quality-adjusted life year or quality adjusted life-year* or quality-adjusted life-year* or SF-36 or sf36 or sf 36 or short form 36 or shortform 36 or sf thirtysix or sf thirty six or shortform thirtysix or shortform thirty six or short form thirtysix or short form thirty-six or short form thirty six or short form health survey or willingness to pay).tw. |  | 45,531        |
| 60        | ((utilit* and score*) or (utilit* and weight*) or Rosser or (health and utilit*) or (utilit* and value) or disutility*).tw.                                                                                                                                                                                                                                                                                                                                                                                                                                             |  | 47,794        |
| 61        | or/53-60                                                                                                                                                                                                                                                                                                                                                                                                                                                                                                                                                                |  | 1,285,715     |
| 62        | 41 or 52 or 61                                                                                                                                                                                                                                                                                                                                                                                                                                                                                                                                                          |  | 7,680,496     |
| 63        | 23 and 62                                                                                                                                                                                                                                                                                                                                                                                                                                                                                                                                                               |  | 15,659        |
| 64        | (animal\$ not human\$).sh,hw.                                                                                                                                                                                                                                                                                                                                                                                                                                                                                                                                           |  | 2,575,972     |
| 65        | 62 not 64                                                                                                                                                                                                                                                                                                                                                                                                                                                                                                                                                               |  | 6,222,937     |
| 66        | 23 and 65                                                                                                                                                                                                                                                                                                                                                                                                                                                                                                                                                               |  | 15,542        |
| <b>67</b> | Limit 46 to (English language and yr="2000-Current")                                                                                                                                                                                                                                                                                                                                                                                                                                                                                                                    |  | <b>14,492</b> |

#### Electronic database search strategy: Cochrane Library

| Search number | Search terms                                                                                                                                                                                     | Parameter | Hits  |
|---------------|--------------------------------------------------------------------------------------------------------------------------------------------------------------------------------------------------|-----------|-------|
| 1             | MeSH descriptor: [Arthritis, Rheumatoid] explode all trees                                                                                                                                       | Disease   | 4,149 |
| 2             | MeSH descriptor: [Spondylitis, Ankylosing] explode all trees                                                                                                                                     |           | 442   |
| 3             | rheumatoid arthritis:ti,ab,kw                                                                                                                                                                    |           | 6,664 |
| 4             | ((rheumatoid or 6eneraliza or revmatoid or rheumatic or 6eneraliz or revmatic or rheumat* or reumat* or revmarthrit*) near/3 (arthrit* or artrit* or diseas* or condition* or nodule*)):ti,ab,kw |           | 7,543 |
| 5             | (felty* near/2 syndrome).ti,ab,kw                                                                                                                                                                |           | 1     |
| 6             | (caplan* near/2 syndrome). Ti,ab,kw                                                                                                                                                              |           | 1     |
| 7             | (sjogren* near/2 syndrome). Ti,ab,kw                                                                                                                                                             |           | 3     |
| 8             | (sicca near/2 syndrome). Ti,ab,kw                                                                                                                                                                |           | 1     |
| 9             | still* disease. Ti,ab,kw                                                                                                                                                                         |           | 23    |
| 10            | ankylosing spondylitis:ti,ab,kw                                                                                                                                                                  |           |       |
| 11            | (bekhterev or bechterew or marie strumpell or rheumatoid spondylitis or 6enerali* or spondyl* or axial).ti,ab,kw                                                                                 |           | 27    |
| 12            | (Non\$radiographic or radiograph* or nr-axSpA).ti,ab,kw                                                                                                                                          |           | 113   |
| 13            | #1 or #2 or #3 or #4 or #5 or #6 or #7 or #8 or #9 or #10 or #11 or #12                                                                                                                          |           | 8,425 |
| 14            | (Abatacept or orenicia or BMS-224818 or BMS 188667):ti,ab,kw                                                                                                                                     |           | 183   |
| 15            | (adalimumab or humira or hum?ra):ti,ab,kw                                                                                                                                                        |           | 526   |
| 16            | (certolizumab or CDP870 or CDP 870 or PHA738144 or PHA 738144                                                                                                                                    |           | 88    |

|           |                                                                                                                                                     |              |       |
|-----------|-----------------------------------------------------------------------------------------------------------------------------------------------------|--------------|-------|
|           | or Cimzia):ti,ab,kw                                                                                                                                 | Intervention |       |
| 17        | (certolizumab near/2 pegol):ti,ab,kw                                                                                                                |              | 78    |
| 18        | (Etanercept or Enbrel or ETA or ETN):ti,ab,kw                                                                                                       |              | 909   |
| 19        | (golimumab or CNTO 148 or CNTO148 or Simponi):ti,ab,kw                                                                                              |              | 114   |
| 20        | (Infliximab or Remicade or Avakine): ti,ab,kw                                                                                                       |              | 827   |
| 21        | (Tocilizumab or actemra or atlizumab):ti,ab,kw                                                                                                      |              | 120   |
| 22        | (Rituximab or rituxan or Mabthera):ti,ab,kw                                                                                                         |              | 1,005 |
| 23        | #14 or #15 or #16 or #17 or #18 or #19 or #20 or #21 or #22                                                                                         |              | 3,238 |
| 24        | #13 and #23                                                                                                                                         | 1,113        |       |
| <b>25</b> | #24 publication year from 2000, in Cochrane Reviews (reviews and protocols), other reviews, trials, technology assessments and economic evaluations | <b>1,099</b> |       |

## Online Resource 2. Data Extraction Grid

| Study information                              | Information extracted                                                                                                                                                                                                                                                                                              |
|------------------------------------------------|--------------------------------------------------------------------------------------------------------------------------------------------------------------------------------------------------------------------------------------------------------------------------------------------------------------------|
| Study characteristics                          | Author<br>Study name<br>Disease<br>Intervention<br>Study design<br>Study objective<br>Trial length<br>Study duration<br>Study size<br>Study setting<br>Detail of cross-over (including timeline of cross-over)<br>Number of patients (per treatment arm)<br>Study limitations<br>Authors' conclusions and comments |
| Treatment data                                 | Dose<br>Frequency<br>Concomitant medication<br>Route of administration                                                                                                                                                                                                                                             |
| Baseline characteristics                       | Intervention and posology<br>Sample size<br>Study duration<br>Age<br>Gender<br>Disease activity and duration<br>Number of previous DMARDs by dose and frequency of administration<br>Biologic-naïve patients<br>Baseline disease characteristics such as DAS28, CRP, ESR, HAQ, ASDAS, BASDAI, mTSS, etc.           |
| Efficacy and radiographic progression outcomes | Tender joint count<br>Swollen joint count<br>Physician global assessment of disease using 10-cm visual analog scale or Likert scale<br>Acute phase reactants such as ESR or CRP                                                                                                                                    |



|                                                                     |                                                                                                                                                                                                                |
|---------------------------------------------------------------------|----------------------------------------------------------------------------------------------------------------------------------------------------------------------------------------------------------------|
|                                                                     | <p>Radiographic progression as measured by Sharp scores, mTSS, or GmSS</p> <p>ACR 20/50/70</p> <p>EULAR response</p> <p>CDAI response</p> <p>SDAI</p> <p>ASDAS response</p> <p>ASAS response</p> <p>BASDAI</p> |
| <p>Health-related quality of life (HRQoL) and economic outcomes</p> | <p>Patient's assessment of functional ability as measured by a validated scale such as the HAQ, ADL, or SF-36 (physical) (HRQoL outcomes)</p> <p>Indirect and direct costs (economic outcomes)</p>             |
